# Supplementary material for: Minimum genomic data sets for rare diseases: A systematic review
Source: Research Square preprint supplement (doi:10.21203/rs.3.rs-8204628/v1), 2026-02-17
Supplement: Supplementary file 1 [file 69acea4855ffb92a41e13678.xlsx]

## Sheet: Consensus - Final Review
Rating overall confidence in the results of the review (MMAT) after consensus meeting				MMAT ELEMENT ASSESSMENT AFTER CONSENSUS MEETING							Final Consensus
ID	Authors/Year	Title	Study Design	S1	S2	Q1	Q2	Q3	Q4	Q5	Assessment Rating
1	Gaggiano et al., 2022	The Autoinflammatory Diseases Alliance Registry of monogenic autoinflammatory diseases	Quantitative descriptive	Yes	Yes	Yes	No	Yes	Can't tell	Yes
2	Stark Z. et al., 2023	Australian Genomics: Outcomes of a 5-year national program to accelerate the integration of genomics into healthcare	Quantitative descriptive	Yes	Yes	Yes	Can't tell	Yes	Can't tell	Yes
3	Mullin A.P. et al., 2021	Standardized Data Structures in Rare Diseases: CDISC User Guides for Duchenne Muscular Dystrophy and Huntington’s Disease	Qualitative	Yes	Yes	Can't tell	Yes	Yes	Can't tell	Yes
4	Visibelli A. et al., 2022	Computational Approaches Integrated in a Digital Ecosystem Platform for a Rare Disease	Qualitative	Yes	Yes	Can't tell	Can't tell	Can't tell	Can't tell	Yes
5	Reza M. et al., 2017	MRC Centre Neuromuscular Biobank (Newcastle and London): Supporting and facilitating rare and neuromuscular disease research worldwide	Quantitative descriptive	Yes	Yes	Yes	Can't tell	Yes	Can't tell	Yes
6	De Antonio M. et al., 2019	The DM-Scope registry: a rare disease innovative framework bridging the gap between research and medical care	Quantitative descriptive	Yes	Yes	Yes	No	Yes	Can't tell	Yes
7	Raycheva R. et al., 2023	Challenges in mapping European rare disease databases, relevant for ML-based screening technologies	Qualitative	Yes	Yes	Yes	Yes	Yes	Yes	Yes
8	Shapiro A. D., 2011	Knowledge and Therapeutic Gaps: A Public Health Problem in the Rare Coagulation Disorders Population	Qualitative	Yes	Can't tell	Can't tell	Can't tell	Can't tell	Can't tell	Yes
9	Choquet R. et al., 2015	A methodology for a minimum data set for rare diseases to support national centers of excellence for healthcare and research	Mixed methods	Yes	Yes	Yes	Yes	Yes	Yes	Yes
10	Birch P., Friedman J.M., 2004	Utility and limitations of genetic disease databases in clinical genetics research: a neurofibromatosis type 1 database experience	Qualitative	Yes	Yes	Yes	Not applicable	Not applicable	Not applicable	Yes		Subtitle (Judgement options)	Yes
11	Johnstone D.L. et al., 2020	Early infantile epileptic encephalopathy due to biallelic pathogenic variants in PIGQ: Report of seven new subjects and review of the literature.	Quantitative non-randomi	Yes		Can't tell	Yes	Yes	Not applicable	Yes			No
12	Della Casa et al., 2022	Development and Implementation of the AIDA International Registry for Patients With Undifferentiated Systemic AutoInflammatory Diseases	Quantitative descriptive	Yes	Yes	Yes	No	Yes	No	Yes			Can't tell
13	Ruseckaite et al., 2023a	Current state of rare disease registries and databases in Australia: a scoping review	Qualitative	Yes	Yes	Yes	Yes	Yes	Yes	Yes			Not reported
14	Ruseckaite et al., 2023b	Informing a national rare disease registry strategy in Australia: a mixed methods study	Mixed methods	Yes	Yes	Yes	Yes	Yes	Yes	Yes			Not applicable
15	Rubinstein et al., 2017	Rare Disease Biospecimens and Patient Registries: Interoperability for Research Promotion, a European Example: EuroBioBank and SpainRDR-BioNER	Qualitative	Yes	Yes	Yes	Not applicable	Not applicable	Not applicable	Yes			Reviewer Discrepancy
16	Toubiana et al., 2015	A “pivot” Model to Set Up Large Scale Rare Diseases Information Systems: Application to the Fibromuscular Dysplasia Registry	Qualitative	Yes	Yes	Yes	No	Can't tell	Can't tell	Can't tell
17	Glassberg et al., 2020	Publication of data collection forms from NHLBI funded sickle cell disease implementation consortium (SCDIC) registry.	Qualitative	Yes	Yes	Yes	No	Yes	Can't tell	Yes
18	Rubinstein et al., 2010	Creating a global rare disease patient registry linked to a rare diseases biorepository database: Rare Disease-HUB (RD-HUB).	Qualitative	Yes	Yes	Yes	Can't tell	Can't tell	Can't tell	Can't tell
19	Santoro et al., 2015	Rare Disease Registries Classification and Characterization: A Data Mining Approach	Quantitative descriptive	Yes	Yes	Yes	No	Yes	Can't tell	Yes
20	Groenen et al., 2021	The de novo FAIRification process of a registry for vascular anomalies	Qualitative	Yes	Yes	Can't tell	Can't tell	Can't tell	Can't tell	Yes
21	Kim et al., 2024	Establishment of a registry of clinical data and bioresources for rare nervous system diseases.	Qualitative	Yes	Yes	Yes	No	Yes	Can't tell	Yes
22	Schieppati et al., 2018	Eight years after an international workshop on myotonic dystrophy patient registries: case study of a global collaboration for a rare disease.	Quantitative descriptive	Yes	Yes	Yes	Yes	Yes	Can't tell	Yes
23	Kohonen‐Corish et al., 2010	How to catch all those mutations-the report of the third human variome project meeting, UNESCO Paris, May 2010	Qualitative	Yes	Can't tell	Can't tell	Can't tell	Can't tell	Can't tell	Yes

## Sheet: Discrepancies - Final Review
Rating overall confidence in the results of the review (MMAT) after consensus meeting				MMAT ELEMENT ASSESSMENT AFTER CONSENSUS MEETING							Final Consensus
ID	Authors/Year	Title	Study Design	S1	S2	Q1	Q2	Q3	Q4	Q5	Assessment Rating
1	Gaggiano et al., 2022	The Autoinflammatory Diseases Alliance Registry of monogenic autoinflammatory diseases	Quantitative descriptive						Reviewer Discrepancies
2	Stark Z. et al., 2023	Australian Genomics: Outcomes of a 5-year national program to accelerate the integration of genomics into healthcare	Quantitative descriptive				Reviewer Discrepancies		Reviewer Discrepancies
3	Mullin A.P. et al., 2021	Standardized Data Structures in Rare Diseases: CDISC User Guides for Duchenne Muscular Dystrophy and Huntington’s Disease	Qualitative			Reviewer Discrepancies	Reviewer Discrepancies		Reviewer Discrepancies
4	Visibelli A. et al., 2022	Computational Approaches Integrated in a Digital Ecosystem Platform for a Rare Disease	Qualitative		Reviewer Discrepancies	Reviewer Discrepancies	Reviewer Discrepancies	Reviewer Discrepancies	Reviewer Discrepancies
5	Reza M. et al., 2017	MRC Centre Neuromuscular Biobank (Newcastle and London): Supporting and facilitating rare and neuromuscular disease research worldwide	Quantitative descriptive				Reviewer Discrepancies			Reviewer Discrepancies
6	De Antonio M. et al., 2019	The DM-Scope registry: a rare disease innovative framework bridging the gap between research and medical care	Quantitative descriptive				Reviewer Discrepancies		Reviewer Discrepancies
7	Raycheva R. et al., 2023	Challenges in mapping European rare disease databases, relevant for ML-based screening technologies	Qualitative
8	Shapiro A. D., 2011	Knowledge and Therapeutic Gaps: A Public Health Problem in the Rare Coagulation Disorders Population	Qualitative		Reviewer Discrepancies	Reviewer Discrepancies		Reviewer Discrepancies	Reviewer Discrepancies
9	Choquet R. et al., 2015	A methodology for a minimum data set for rare diseases to support national centers of excellence for healthcare and research	Mixed methods
10	Birch P., Friedman J.M., 2004	Utility and limitations of genetic disease databases in clinical genetics research: a neurofibromatosis type 1 database experience	Qualitative				Reviewer Discrepancies	Reviewer Discrepancies	Reviewer Discrepancies			Subtitle (Judgement options)	Yes
11	Johnstone D.L. et al., 2020	Early infantile epileptic encephalopathy due to biallelic pathogenic variants in PIGQ: Report of seven new subjects and review of the literature.	Quantitative non-randomi			Reviewer Discrepancies	Reviewer Discrepancies		Reviewer Discrepancies				No
12	Della Casa et al., 2022	Development and Implementation of the AIDA International Registry for Patients With Undifferentiated Systemic AutoInflammatory Diseases	Quantitative descriptive				Reviewer Discrepancies		Reviewer Discrepancies	Reviewer Discrepancies			Can't tell
13	Ruseckaite et al., 2023a	Current state of rare disease registries and databases in Australia: a scoping review	Qualitative										Not reported
14	Ruseckaite et al., 2023b	Informing a national rare disease registry strategy in Australia: a mixed methods study	Mixed methods						Reviewer Discrepancies	Reviewer Discrepancies			Not applicable
15	Rubinstein et al., 2017	Rare Disease Biospecimens and Patient Registries: Interoperability for Research Promotion, a European Example: EuroBioBank and SpainRDR-BioNER	Qualitative				Reviewer Discrepancies	Reviewer Discrepancies	Reviewer Discrepancies				Reviewer Discrepancies
16	Toubiana et al., 2015	A “pivot” Model to Set Up Large Scale Rare Diseases Information Systems: Application to the Fibromuscular Dysplasia Registry	Qualitative				Reviewer Discrepancies	Reviewer Discrepancies	Reviewer Discrepancies	Reviewer Discrepancies
17	Glassberg et al., 2020	Publication of data collection forms from NHLBI funded sickle cell disease implementation consortium (SCDIC) registry.	Qualitative
18	Rubinstein et al., 2010	Creating a global rare disease patient registry linked to a rare diseases biorepository database: Rare Disease-HUB (RD-HUB).	Qualitative
19	Santoro et al., 2015	Rare Disease Registries Classification and Characterization: A Data Mining Approach	Quantitative descriptive						Reviewer Discrepancies
20	Groenen et al., 2021	The de novo FAIRification process of a registry for vascular anomalies	Qualitative			Reviewer Discrepancies	Reviewer Discrepancies	Reviewer Discrepancies	Reviewer Discrepancies
21	Kim et al., 2024	Establishment of a registry of clinical data and bioresources for rare nervous system diseases.	Qualitative		Reviewer Discrepancies	Reviewer Discrepancies	Reviewer Discrepancies	Reviewer Discrepancies		Reviewer Discrepancies
22	Schieppati et al., 2018	Eight years after an international workshop on myotonic dystrophy patient registries: case study of a global collaboration for a rare disease.	Quantitative descriptive				Reviewer Discrepancies
23	Kohonen‐Corish et al., 2010	How to catch all those mutations-the report of the third human variome project meeting, UNESCO Paris, May 2010	Qualitative

## Sheet: TTK- Review
Rating overall confidence in the results of the review (MMAT) after consensus meeting				MMAT ELEMENT ASSESSMENT AFTER CONSENSUS MEETING							Reviewer Comment
ID	Authors/Year	Title	Study Design	S1	S2	Q1	Q2	Q3	Q4	Q5
1	Gaggiano et al., 2022	The Autoinflammatory Diseases Alliance Registry of monogenic autoinflammatory diseases	Quantitative descriptive	Yes	Yes	Yes	No	Yes	No	Yes	Moderate: The study is well-structured and relevant, but there are limitations in representativeness, especially because many centers have not yet obtained ethics approval, and there is a risk of nonresponse bias.
2	Stark Z. et al., 2023	Australian Genomics: Outcomes of a 5-year national program to accelerate the integration of genomics into healthcare	Quantitative descriptive	Yes	Yes	Yes	Yes	Yes	No	Yes	Moderate: The study is well-structured and relevant, with good geographic and clinical representativeness of the target population, appropriate measurements, and suitable statistical analysis for the program’s objectives. However, for question 4, the article does not describe robust strategies for complete patient inclusion, which may lead to gaps in participant registration and increase the risk…
3	Mullin A.P. et al., 2021	Standardized Data Structures in Rare Diseases: CDISC User Guides for Duchenne Muscular Dystrophy and Huntington’s Disease	Quantitative descriptive	Yes	Yes	Yes	Yes	Yes	Yes	Yes	High: ok	Qualitativo
4	Visibelli A. et al., 2022	Computational Approaches Integrated in a Digital Ecosystem Platform for a Rare Disease	Quantitative descriptive	Yes	Yes	Yes	No	Yes	No	Yes	Moderate: The sample may not represent all patients with AKU, as the study relies on voluntary contributions and data from specific registries, which introduces a risk of incomplete or missing data.	Qualitativo
5	Reza M. et al., 2017	MRC Centre Neuromuscular Biobank (Newcastle and London): Supporting and facilitating rare and neuromuscular disease research worldwide	Quantitative descriptive	Yes	Yes	Yes	Can't tell	Yes	Can't tell	NA	Adequate: The article provides a clear and detailed description of the biobank’s structure, collected data, and potential for supporting research.
6	De Antonio M. et al., 2019	The DM-Scope registry: a rare disease innovative framework bridging the gap between research and medical care	Quantitative descriptive	Yes	Yes	Yes	Yes	Yes	No	Yes	Moderate: the use of Last Observation Carried Forward (LOCF) imputation, indicates a real risk of nonresponse bias.
7	Raycheva R. et al., 2023	Challenges in mapping European rare disease databases, relevant for ML-based screening technologies	Qualitative	Yes	Yes	Yes	Yes	Yes	Yes	Yes	High: ok	aqui fiquei com dúvida na classificação. creio que seja qualitativo mesmo.
8	Shapiro A. D., 2011	Knowledge and Therapeutic Gaps: A Public Health Problem in the Rare Coagulation Disorders Population	Qualitative	Yes	Yes	Yes	Can't tell	Yes	Yes	Yes	Adequate
9	Choquet R. et al., 2015	A methodology for a minimum data set for rare diseases to support national centers of excellence for healthcare and research	Qualitative	Yes	Yes	Yes	Yes	Yes	Yes	Yes	high: ok	mix
10	Birch P., Friedman J.M., 2004	Utility and limitations of genetic disease databases in clinical genetics research: a neurofibromatosis type 1 database experience	Qualitative	Yes	Yes	Yes	Yes	Yes	Yes	Yes	high: ok	Subtitle (Judgement options)	Yes
11	Johnstone D.L. et al., 2020	Early infantile epileptic encephalopathy due to biallelic pathogenic variants in PIGQ: Report of seven new subjects and review of the literature.	Quantitative non-randomi	Yes	Yes	Can't tell	Yes	Yes	Yes	Yes	Adequate		No
12	Della Casa et al., 2022	Development and Implementation of the AIDA International Registry for Patients With Undifferentiated Systemic AutoInflammatory Diseases	Quantitative descriptive	Yes	Yes	Yes	Can't tell	Yes	No	Yes	Moderate: The registry’s representativeness may be limited by unequal participation among centers and countries, depending on available resources and ethics approvals. Voluntary data entry may introduce nonresponse bias and affect completeness.		Can't tell
13	Ruseckaite et al., 2023a	Current state of rare disease registries and databases in Australia: a scoping review	Qualitative	Yes	Yes	Yes	Yes	Yes	Yes	Yes	high		Not reported
14	Ruseckaite et al., 2023b	Informing a national rare disease registry strategy in Australia: a mixed methods study	Mixed methods	Yes	Yes	Yes	Yes	Yes	Yes	Yes	high		Not applicable
15	Rubinstein et al., 2017	Rare Disease Biospecimens and Patient Registries: Interoperability for Research Promotion, a European Example: EuroBioBank and SpainRDR-BioNER	Qualitative	Yes	Yes	Yes	Yes	Yes	Yes	Yes	high
16	Toubiana et al., 2015	A “pivot” Model to Set Up Large Scale Rare Diseases Information Systems: Application to the Fibromuscular Dysplasia Registry	Quantitative descriptive	Yes	Yes	Yes	Can't tell	Yes	NA	Yes	adequate: The study is well-structured, objectives are clear, and the data are largely appropriate. Limitations include uncertainty regarding sample representativeness	Rever - quali
17	Glassberg et al., 2020	Publication of data collection forms from NHLBI funded sickle cell disease implementation consortium (SCDIC) registry.	Qualitative	Yes	Yes	Yes	No	Yes	Can't tell	Yes	Moderate: Data collection methods insufficiently detailed (unclear expert selection, process of consensus, or documentation)
18	Rubinstein et al., 2010	Creating a global rare disease patient registry linked to a rare diseases biorepository database: Rare Disease-HUB (RD-HUB).	Qualitative	Yes	Yes	Yes	Can't tell	Can't tell	Can't tell	Can't tell	Moderate: The article provides valuable descriptive and practical content (registry tools) but does not present sufficient methodological detail to confirm qualitative rigor.
19	Santoro et al., 2015	Rare Disease Registries Classification and Characterization: A Data Mining Approach	Quantitative descriptive	Yes	Yes	Yes	No	Yes	Yes	Yes	Moderate: The study is well-structured and employs appropriate statistical methods, but the limited sample size reduce its generalizability
20	Groenen et al., 2021	The de novo FAIRification process of a registry for vascular anomalies	Qualitative	Yes	Yes	Yes	Yes	Yes	Yes	Yes	High	eu acho que é um estudo descritivo que não se enquadra em nenhum, e agora? fico na dúvida se é qualitativo, pq quantitativo não é. não sei como avaliar aqui. Se for considerar qualitativo, creio que esteja tudo ok
21	Kim et al., 2024	Establishment of a registry of clinical data and bioresources for rare nervous system diseases.	Qualitative	Yes	Can't tell	Can't tell	Can't tell	Can't tell	Can't tell	Can't tell	Low: The registry is still under construction, and clinical data are not publicly available.
22	Schieppati et al., 2018	Eight years after an international workshop on myotonic dystrophy patient registries: case study of a global collaboration for a rare disease.	Quantitative descriptive	Yes	Yes	Yes	Yes	Yes	Can't tell	Yes	Moderate: The study is based on data from 22 international registries, providing relevant descriptive quantitative insights. However, it lacks detailed information on response rates and potential nonresponse bias.
23	Kohonen‐Corish et al., 2010	How to catch all those mutations-the report of the third human variome project meeting, UNESCO Paris, May 2010	Qualitative	Yes	Can't tell	Can't tell	Can't tell	Can't tell	Can't tell	Yes	Low: The article fulfills its purpose as a descriptive report and institutional synthesis of a scientific meeting, but it does not provide sufficient methodological elements to assess qualitative rigor

## Sheet: FAB - Review
Rating overall confidence in the results of the review (MMAT) after consensus meeting				MMAT ELEMENT ASSESSMENT AFTER CONSENSUS MEETING							Reviewer Comment
ID	Authors/Year	Title	Study Design	S1	S2	Q1	Q2	Q3	Q4	Q5
1	Gaggiano et al., 2022	The Autoinflammatory Diseases Alliance Registry of monogenic autoinflammatory diseases	Quantitative descriptive	Yes	Yes	Yes	No	Yes	Can't tell	Yes	| Multicentre REDCap registry; CDE/FAIR aligned; ethics/ELSI described; not population-based; no non-response info; preliminary descriptive counts
2	Stark Z. et al., 2023	Australian Genomics: Outcomes of a 5-year national program to accelerate the integration of genomics into healthcare	Quantitative descriptive	Yes	Yes	Yes	No	Yes	Can't tell	Yes	Program-wide perspective across 19 flagships; national scope but underrepresentation noted; accredited testing and clear outcomes; limited detail on nonresponse and cohort representativeness; implementation context (ethics delays, COVID-19) affects generalisability
3	Mullin A.P. et al., 2021	Standardized Data Structures in Rare Diseases: CDISC User Guides for Duchenne Muscular Dystrophy and Huntington’s Disease	Qualitative	Yes	Yes	Can't tell	No	Yes	Can't tell	Yes	Methods/standards paper (CDISC TAUGs for DMD/HD); reports integration outputs (15 DMD datasets >4,500 subjects; HD ~20,000 planned); not population-based; no nonresponse/representativeness detail; appropriate narrative/descriptive reporting
4	Visibelli A. et al., 2022	Computational Approaches Integrated in a Digital Ecosystem Platform for a Rare Disease	Qualitative	Yes	Can't tell	Can't tell	Can't tell	Can't tell	Can't tell	Yes	Narrative review of ApreciseKUre and ML tools; no primary dataset reported, so sampling/representativeness/nonresponse not assessable; analysis is descriptive narrative appropriate to aims
5	Reza M. et al., 2017	MRC Centre Neuromuscular Biobank (Newcastle and London): Supporting and facilitating rare and neuromuscular disease research worldwide	Quantitative descriptive	Yes	Yes	Yes	No	Yes	Can't tell	Yes	UK biobank profile: >13k samples, standardised SOPs and coding, strong ethics/governance; not population-based; no nonresponse data; extensive national/international distribution and support for studies
6	De Antonio M. et al., 2019	The DM-Scope registry: a rare disease innovative framework bridging the gap between research and medical care	Quantitative descriptive	Yes	Yes	Yes	No	Yes	Can't tell	Yes	National DM registry (55 centres); standardized CDS and strong QA; uneven regional coverage; not population-based; missing/underreported deaths; descriptive and survival analyses appropriate
7	Raycheva R. et al., 2023	Challenges in mapping European rare disease databases, relevant for ML-based screening technologies	Qualitative	Yes	Yes	Yes	Yes	Yes	Yes	Yes	PRISMA-ScR scoping review; clear PCC and charting form; English-only/2013–2022 and no grey literature limit representativeness; descriptive synthesis appropriate to aims
8	Shapiro A. D., 2011	Knowledge and Therapeutic Gaps: A Public Health Problem in the Rare Coagulation Disorders Population	Qualitative	Yes	Can't tell	Can't tell	Can't tell	Can't tell	Can't tell	Yes	Narrative/policy review of RCD gaps and initiatives (UDC, EN-RBD, Resource Room); no primary dataset, so sampling/representativeness/nonresponse not assessable; analysis is descriptive narrative aligned with aims
9	Choquet R. et al., 2015	A methodology for a minimum data set for rare diseases to support national centers of excellence for healthcare and research	Mixed methods	Yes	Yes	Yes	Yes	Yes	Yes	Yes	National methodology + expert survey (81% response) to define F-MDS-RD; balanced across specialties; outputs 58 DEs and HL7/FHIR mapping; stakeholder-focused, not patient-level outcome evaluation.	Subtitle (Judgement options)	Yes
10	Birch P., Friedman J.M., 2004	Utility and limitations of genetic disease databases in clinical genetics research: a neurofibromatosis type 1 database experience	Qualitative	Yes	Yes	Yes	Can't tell	Can't tell	Can't tell	Can't tell	Narrative/methodological review of genetic disease databases with NF1 examples; no primary dataset so sampling/representativeness/nonresponse not assessable; provides detailed design/quality/confidentiality recommendations and one illustrative comparison table		No
11	Johnstone D.L. et al., 2020	Early infantile epileptic encephalopathy due to biallelic pathogenic variants in PIGQ: Report of seven new subjects and review of the literature.	Quantitative descriptive	Yes	Yes	Yes	No	Yes	Can't tell	Yes	Multicentre case series (n=7) with genetic confirmation and functional rescue; detailed EEG/MRI; convenience sampling, not population-based; no nonresponse data; analyses descriptive and fit for aim		Can't tell
12	Della Casa et al., 2022	Development and Implementation of the AIDA International Registry for Patients With Undifferentiated Systemic AutoInflammatory Diseases	Quantitative descriptive	Yes	Yes	Yes	No	Yes	Can't tell	Yes	International REDCap registry for USAIDs; clear inclusion/exclusion and ethics; rich instrument set (23 forms, ~3,769 fields); centre-based (not population-based); no patient-level nonresponse data; analysis plan suited to aims.		Not reported
13	Ruseckaite et al., 2023a	Current state of rare disease registries and databases in Australia: a scoping review	Qualitative	Yes	Yes	Yes	Yes	Yes	Yes	Yes	PRISMA-ScR scoping review of Australian RDRs; broad sources incl. grey lit; English-only/scope limits affect representativeness; structured extraction; descriptive synthesis of 74 registries highlights heterogeneity and coordination needs.		Not applicable
14	Ruseckaite et al., 2023b	Informing a national rare disease registry strategy in Australia: a mixed methods study	Mixed methods	Yes	Yes	Yes	Yes	Yes	Can't tell	Can't tell	Exploratory sequential survey (40 RDRs) + interviews (n=8) integrated to inform national strategy; methods clearly described; acknowledges limits on response/representativeness; no explicit handling of quant–qual divergences.
15	Rubinstein et al., 2017	Rare Disease Biospecimens and Patient Registries: Interoperability for Research Promotion, a European Example: EuroBioBank and SpainRDR-BioNER	Qualitative	Yes	Yes	Yes	Can't tell	Can't tell	Can't tell	Yes	Narrative chapter on interoperability (EuroBioBank, Spain RDR-BioNER); no primary dataset, so sampling/representativeness/nonresponse not assessable; clearly outlines GUID/HPO/BRISQ and governance
16	Toubiana et al., 2015	A “pivot” Model to Set Up Large Scale Rare Diseases Information Systems: Application to the Fibromuscular Dysplasia Registry	Qualitative	Yes	Yes	Yes	No	Can't tell	Can't tell	Can't tell	Methods/implementation of “pivot” model; initial FMD registry (471 records; >2,200 items); strong use of standard terminologies/semantic ETL; centre-based, not population-based; no nonresponse data.
17	Glassberg et al., 2020	Publication of data collection forms from NHLBI funded sickle cell disease implementation consortium (SCDIC) registry.	Qualitative	Yes	Yes	Yes	No	Yes	Can't tell	Yes	SCDIC registry methods/forms paper; ≥2,400 participants across 8 sites; validated PROs (ASCQ-Me/PhenX/PROMIS); centre-based and age-limited; no nonresponse data; REDCap dictionaries shared for reuse.
18	Rubinstein et al., 2010	Creating a global rare disease patient registry linked to a rare diseases biorepository database: Rare Disease-HUB (RD-HUB).	Qualitative	Yes	Yes	Yes	Can't tell	Can't tell	Can't tell	Can't tell	NIH workshop report on federated RD registry + RD-HUB; narrative recommendations (standards, governance, ethics, biobanking); no primary dataset, so sampling/representativeness/nonresponse not assessable; analysis is narrative and fit to aim
19	Santoro et al., 2015	Rare Disease Registries Classification and Characterization: A Data Mining Approach	Quantitative descriptive	Yes	Yes	Yes	No	Yes	Can't tell	Yes	EPIRARE survey of 219 RDRs; cluster analysis identified 3 types (PHR, CGRR, TR) and RF highlighted key variables; EU focus limits representativeness; response bias not reported
20	Groenen et al., 2021	The de novo FAIRification process of a registry for vascular anomalies	Qualitative	Yes	Yes	Can't tell	Can't tell	Can't tell	Can't tell	Yes	De novo FAIRification of VASCA registry (CDE semantic model, eCRF→RDF, FAIR Data Point); ethics approved; no primary dataset analysed, so sampling/representativeness/nonresponse not assessable; methods and reusable assets well-documente
21	Kim et al., 2024	Establishment of a registry of clinical data and bioresources for rare nervous system diseases.	Quantitative descriptive	Yes	Yes	Yes	No	Yes	Can't tell	Yes	5-centre Korean registry for ALS/HSP/SCA; 3-year prospective design, standardised CRFs and validated scales, linked biobank; centre-based (not population), small target n, selection/maintenance limitations; nonresponse not reported
22	Schieppati et al., 2018	Eight years after an international workshop on myotonic dystrophy patient registries: case study of a global collaboration for a rare disease.	Quantitative descriptive	Yes	Yes	Yes	No	Yes	Can't tell	Yes	Global survey of DM registries (22/25; >10k patients); assesses adoption of the 2009 Naarden dataset and registry purposes; invited frame may omit registries; no nonresponse assessment; descriptive analysis appropriate.
23	Kohonen‐Corish et al., 2010	How to catch all those mutations-the report of the third human variome project meeting, UNESCO Paris, May 2010	Qualitative	Yes	Can't tell	Can't tell	Can't tell	Can't tell	Can't tell	Yes	Meeting report of 3rd HVP (UNESCO, Paris); synthesises session recommendations (ethics, standards, LSDBs) without primary dataset; sampling/representativeness/nonresponse not assessable; narrative analysis appropriate

## Sheet: MMAT_Codebook
Field	Description
How to use	Choose the sheet matching the study design. Fill Study_ID/Citation. For each criterion, select a judgement and optionally add notes. MMAT discourages computing a single overall score; instead report criterion-level judgements and a brief appraisal summary.
Judgement options	Yes, No, Can't tell, Not reported, Not applicable
Design sheets	Qualitative; Quantitative RCT; Quantitative non-randomized; Quantitative descriptive; Mixed methods
Reference	MMAT (2018). Hong et al. 'Mixed Methods Appraisal Tool (MMAT), version 2018'.
Screening
S1 – Clear research question?
S2 – Data allow answering the question?
Criteria by design
Qualitative
- Q1. Is the qualitative approach appropriate to answer the research question?
- Q2. Are the qualitative data collection methods adequate to address the research question?
- Q3. Are the findings adequately derived from the data?
- Q4. Is the interpretation of results sufficiently substantiated by data?
- Q5. Is there coherence between qualitative data sources, collection, analysis and interpretation?
Quantitative RCT
- Q1. Is randomization appropriately performed?
- Q2. Are the groups comparable at baseline?
- Q3. Are there complete outcome data?
- Q4. Are outcome assessors blinded to the intervention provided?
- Q5. Did the participants adhere to the assigned intervention?
Quantitative non-randomized
- Q1. Are the participants representative of the target population?
- Q2. Are measurements appropriate regarding both the outcome and intervention (or exposure)?
- Q3. Are there complete outcome data?
- Q4. Are the confounders accounted for in the design and analysis?
- Q5. During the study period, is the intervention administered (or exposure occurred) as intended?
Quantitative descriptive
- Q1. Is the sampling strategy relevant to address the research question?
- Q2. Is the sample representative of the target population?
- Q3. Are the measurements appropriate?
- Q4. Is the risk of nonresponse bias low?
- Q5. Is the statistical analysis appropriate to answer the research question?
Mixed methods
- Q1. Is there an adequate rationale for using a mixed methods design to address the research question?
- Q2. Are the different components of the study effectively integrated to answer the research question?
- Q3. Are the outputs of the integration of qualitative and quantitative components adequately interpreted?
- Q4. Are divergences and inconsistencies between quantitative and qualitative results adequately addressed?
- Q5. Do the different components of the study adhere to the quality criteria of each tradition of the methods involved?
