# Supplementary material for: Minimum genomic data sets for rare diseases: A systematic review
Source: Research Square preprint supplement (doi:10.21203/rs.3.rs-8204628/v1), 2026-02-17
Supplement: Supplementary file 2 [file b65410b42f1554fd39f2506b.xlsx]

## Sheet: Página1
ID	1	2	3	4	5	6	7	8	9	10	11	12	13	14	15	16	17	18	19	20	21	22	23
Author and year	Gaggiano et al., 2022	Stark Z. et al., 2023	Mullin A.P. et al., 2021	Visibelli A. et al., 2022	Reza M. et al., 2017	De Antonio M. et al., 2019	Raycheva R. et al., 2023	Shapiro A. D., 2011	Choquet R. et al., 2015	Birch P., Friedman J.M., 2004	Johnstone D.L. et al., 2020	Della Casa et al., 2022	Ruseckaite et al., 2023a	Ruseckaite et al., 2023b	Rubinstein et al., 2017	Toubiana et al., 2015	Glassberg et al., 2020	Rubinstein et al., 2010	Santoro et al., 2015	Groenen et al., 2021	Kim et al., 2024	Schieppati et al., 2018	Kohonen‐Corish et al., 2010
Study title	The Autoinflammatory Diseases Alliance Registry of monogenic autoinflammatory diseases	Australian Genomics: Outcomes of a 5-year national program to accelerate the integration of genomics into healthcare	Standardized Data Structures in Rare Diseases: CDISC User Guides for Duchenne Muscular Dystrophy and Huntington’s Disease	Computational Approaches Integrated in a Digital Ecosystem Platform for a Rare Disease	MRC Centre Neuromuscular Biobank (Newcastle and London): Supporting and facilitating rare and neuromuscular disease research worldwide	The DM-Scope registry: a rare disease innovative framework bridging the gap between research and medical care	Challenges in mapping European rare disease databases, relevant for ML-based screening technologies	Knowledge and Therapeutic Gaps: A Public Health Problem in the Rare Coagulation Disorders Population	A methodology for a minimum data set for rare diseases to support national centers of excellence for healthcare and research	Utility and limitations of genetic disease databases in clinical genetics research: a neurofibromatosis type 1 database experience	Early infantile epileptic encephalopathy due to biallelic pathogenic variants in PIGQ: Report of seven new subjects and review of the literature.	Development and Implementation of the AIDA International Registry for Patients With Undifferentiated Systemic AutoInflammatory Diseases	Current state of rare disease registries and databases in Australia: a scoping review	Informing a national rare disease registry strategy in Australia: a mixed methods study	Rare Disease Biospecimens and Patient Registries: Interoperability for Research Promotion, a European Example: EuroBioBank and SpainRDR-BioNER	A “pivot” Model to Set Up Large Scale Rare Diseases Information Systems: Application to the Fibromuscular Dysplasia Registry	Publication of data collection forms from NHLBI funded sickle cell disease implementation consortium (SCDIC) registry.	Creating a global rare disease patient registry linked to a rare diseases biorepository database: Rare Disease-HUB (RD-HUB).	Rare Disease Registries Classification and Characterization: A Data Mining Approach	The de novo FAIRification process of a registry for vascular anomalies	Establishment of a registry of clinical data and bioresources for rare nervous system diseases.	Eight years after an international workshop on myotonic dystrophy patient registries: case study of a global collaboration for a rare disease.	How to catch all those mutations-the report of the third human variome project meeting, UNESCO Paris, May 2010
Country/Region	Multinational (24 countries, including Italy, Brazil, Turkey, Egypt, Belgium, Poland, etc.)	Australia	Primarily USA, with international collaboration	Italy	United Kingdom	France	European Union (multi-country)	United States	France	Canada	International (cases from Canada, Japan, USA, UK)	International (led by Italy, involving 23 countries)	Australia	Australia	Europe (focus on Spain and international partners via EuroBioBank)	France	United States	United States (global scope proposed)	Italy / European Union (EPIRARE)	Netherlands (EU project)	Republic of Korea	Switzerland	International (Global)
Disease(s) addressed	Monogenic autoinflammatory diseases (mAIDs)	Rare diseases, cancer, and other genetic conditions	Duchenne Muscular Dystrophy (DMD), Huntington’s Disease (HD)	Alkaptonuria (AKU)	Various neuromuscular diseases (e.g., muscular dystrophies, myopathies, neuropathies)	Myotonic Dystrophy type 1 (DM1)	Multiple rare diseases, not disease-specific; focus on database infrastructure	Rare coagulation disorders (e.g., factors I, II, V, VII, X, XI, XIII deficiencies)	Multiple rare diseases — methodology not limited to specific conditions	Neurofibromatosis type 1 (NF1)	Early Infantile Epileptic Encephalopathy (EIEE) due to PIGQ variants	Undifferentiated Systemic AutoInflammatory Diseases (USAIDs)	Rare diseases (broad scope – includes >80 registries across various rare conditions)	Rare diseases (not disease-specific; focused on national strategy)	Rare diseases (broad scope across >6,000 disorders)	Fibromuscular Dysplasia (FMD)	Sickle Cell Disease (SCD)	Rare diseases (broad; non-disease-specific)	Multiple rare diseases (e.g., rare cancers, neuromuscular diseases, congenital anomalies, Gaucher disease, cystic fibrosis, rare lung diseases)	Vascular anomalies	ALS, Hereditary Spastic Paraplegia (HSP), Spinocerebellar Ataxia (SCA)	Broad spectrum (not disease-specific)	Broad: All rare genetic diseases
Classification	Monogenic, autoinflammatory	Mixed: monogenic rare diseases and complex conditions including cancer	Neuromuscular (DMD), Neurodegenerative (HD)	Metabolic disorder	Neuromuscular disorders	Neuromuscular, trinucleotide repeat disorder	Not applicable, methodological/database mapping study	Hematologic, monogenic disorders	Not applicable, focused on registry and data standard development	Monogenic, neurocutaneous disorder	Monogenic, neurodevelopmental disorder	Autoinflammatory diseases (genetic or suspected to be genetic)	Mixed, includes neuromuscular, metabolic, genetic, congenital, autoimmune, among others	Not applicable (policy-focused study, not condition-specific)	Mixed – includes neuromuscular, genetic, metabolic and others	Rare vascular disease	Hemoglobinopathy; Monogenic	Not applicable (platform-level design)	Mixed: neuromuscular, metabolic, congenital, oncologic	Vascular (multisystemic)	Neuromuscular, neurodegenerative	Mixed (all rare diseases)	Genetic (monogenic focus)
Types of data in MDS	Demographics, clinical data, laboratory, instrumental, genetic data, socio-economic information	Genomic data, phenotypic/clinical data (standardized using HPO), laboratory, diagnostic, consent, and longitudinal follow-up data	Clinical, genetic, functional, cognitive, biomarker, imaging, patient-reported outcomes	Genetic variants, clinical data, patient-reported outcomes, biochemical and imaging data	DNA, RNA, tissue samples, clinical phenotypes, histology images, and biochemistry data	Clinical, genetic, sociodemographic, functional scores, ECG, cognitive and respiratory data	Registry metadata, patient clinical records, omics data, imaging, biobank information	Epidemiological data, diagnostic rates, clinical management patterns	Demographics, diagnosis, genetic and clinical information, comorbidities, treatments, follow-up	Genetic mutations, clinical features, phenotypic variability, family history	Clinical phenotype, EEG, MRI, genetic variants, biochemical tests	Demographics, genetic data (if available), clinical manifestations, comorbidities, treatments, outcomes, lab and imaging data, quality of life measures	Varies by registry: commonly includes patient demographics, clinical diagnosis, genetic data, outcomes, treatments, laboratory values	Proposed MDS includes demographics, diagnosis, genetic data, treatment, outcomes, patient experience, and health service use	Clinical phenotype (using HPO), genotype, omics data, biobank metadata, demographic data	Clinical data, phenotypes, imaging (angiographic, hemodynamic), genetic and laboratory data, treatment info; >2,200 items per patient record	Demographics, clinical history, pain episodes, treatment history, lab values, patient-reported outcomes (PROs), mental and social health, reproductive history	Demographics, diagnosis, family history, phenotypic and genotypic information, biospecimen metadata	Genetic variants, clinical data, sociodemographic data, anthropometric data, medication use, patient-reported outcomes, family history, date of death	Clinical, phenotypic, ontological, metadata	Clinical data, family history, genetic test results, imaging, EMG/NCS, CSF (if available), PROMs, biospecimens, longitudinal follow-up	Demographics, diagnosis (ICD + ORPHA), clinical data, family history, genetic data (if available), treatment, consent info	Genetic variants, phenotypic data, metadata, ontology terms (HPO, HGVS), lab test data
Data sources	Clinical records, genetic test reports, instrumental exams, patient-reported outcomes	Whole Exome Sequencing (WES), Whole Genome Sequencing (WGS), clinical reports, consent management systems	Clinical assessments, genetic testing, functional tests, caregiver/patient input	Clinical records, genetic sequencing, biochemical assays, patient apps, imaging tools	Biobanked human samples, clinical data from referring physicians, histopathology and genetic testing	Medical records, clinical evaluations, functional tests, diagnostic labs, national health systems	European RD registries, biobanks, research projects, public health datasets	National Hemophilia Foundation surveys, literature review, patient registries	Existing registries, clinical data from national centers of excellence, hospital records	Clinical records, molecular testing reports, literature, patient surveys	Whole Exome Sequencing, clinical records, neuroimaging, functional studies	Clinical records; genetic tests if available (e.g. NGS); patient-reported outcomes	Electronic medical records, patient-reported data, clinician input, linked administrative datasets; some use biobank/genomic sources	Proposed integration of clinical data, patient-reported outcomes, and administrative data (not yet implemented)	Biobanks (DNA, serum, plasma, tissues), patient registries, hospitals, national health databases	Multiple local databases (DFM, HEGP, PROFILE, BAMARA), hospital records, case report forms	Patient surveys (ASCQ-Me, PROMIS, PhenX), medical record abstraction, REDCap-based eCRFs	Patient-reported data, physician-entered data, linked biospecimens, molecular lab results	Not explicitly stated; inferred from clinical registries, national/international disease networks (e.g., Treat-NMD), possibly genomic databases	eCRF, EDC, Semantic Model (RDF), not genomic	Clinical forms, blood, CSF, genetic tests (NGS, WES, WGS)	Hospital records, national health databases, patient reports	Clinical labs, variant databases (LSDBs), research centers
Guideline adherence	Based on EPIRARE CDEs, OMIM, ICD-10; built following Kodra et al.’s template; Partially harmonized with FAIR/ERN/INFEVERS standards	Aligned with GA4GH, HL7 FHIR, and local ethical standards; partially harmonized with international standards	Based on CDISC standards (SDTM, ADaM), aligned with regulatory requirements and therapeutic area user guides	Not directly aligned to international standards, but uses modular interoperable architecture; FAIR principles mentioned	Follows Human Tissue Authority (HTA) and Medical Research Council (MRC) guidelines; interoperable with EuroBioBank and RD-Connect	Developed in coordination with French Rare Disease Plan and national e-health strategies; aligned with EU CERFA	Mapped against FAIR principles, GDPR, EU RD codification standards (e.g., ORPHAcodes)	Not explicitly aligned with a data model; emphasizes public health standards and clinical practice gaps	Aligned with Orphanet, EUCERD recommendations, and international classification systems (e.g., ORPHAcodes, HPO)	Not standardized; database created for research and clinical correlation purposes	Not aligned to a standardized MDS; data extracted for clinical case series and molecular correlation	Based on expert consensus; standardized using REDCap platform; no mention of specific ontologies like HPO	Only 6% followed established data standards (e.g. HPO, Orphanet); most developed local schemas	Emphasis on aligning with international standards (e.g., Orphanet, HPO); not implemented yet	Use of BRISQ, HPO, GUID (NIH); best practices from ISBER, CAP, NCI	Yes, aligns data with reference terminologies: HPO, ICD-10, Orphanet, MedDRA, ATC, CCAM	Yes, uses validated instruments (ASCQ-Me, PROMIS, PhenX) selected by expert consensus	Yes, follows Common Data Elements (CDEs), privacy regulations, and standardized data elements recommended by NIH	Yes, based on EUCERD and EPIRARE recommendations	Yes (EU CDEs + FAIR principles)	Partially (custom structure aligned with Korean standards)	Yes (European recommendations + Swiss health policy)	Yes (HGVS, HVP standards, WHO collaboration)
MDS updated?	Yes, Modular and updatable infrastructure	Yes, continuous adaptation over 5 years based on program needs	Yes, with future expansion and maintenance planned by CDISC Rare Disease Subteam	Yes, modular platform designed to support updates and new modules	Not explicitly mentioned; the biobank is continually populated with new data and samples	Yes, modular architecture allows ongoing updates and expansions	Not applicable — the study assesses existing databases, not one specific MDS	Not applicable, no structured MDS developed in this study	Yes, iterative process validated through pilot testing and expert review	Yes, but updates were manually curated by the authors as new information became available	Not applicable, no structured registry or MDS created	Yes, dynamic registry with ongoing update capability by investigators	Not consistently; most registries did not report maintenance/update procedures	Not applicable yet, development phase	Not specified per frequency, but integration with dynamic systems (e.g., RD-Connect) suggested	Yes, model allows scalable and dynamic updates through electronic forms	Yes, updated iteratively via multi-site consensus; annual follow-up surveys implemented	Yes, system designed for dynamic updates and modular data structure	Yes, ethics committee review mentioned, especially for CGRRs and TRs	Yes (plans for extension)	Planned (longitudinal design)	Yes (planned periodic review)	Yes (iterative process)
MDS application context	Clinical diagnosis; Biomedical/genomic research; Therapeutic decision support; Public health data integration	Clinical diagnosis Biomedical/genomic research Therapeutic decision support Policy integration	Clinical research; Regulatory submission; Data sharing and integration with other platforms	Clinical diagnosis; Biomedical research; Therapeutic decision support ; Integration into national platform (AKUhub)	Biomedical research ; Therapeutic development ; Biobanking for clinical and translational studies	Clinical care ; Biomedical research ; Epidemiological surveillance ; Public health planning	Research infrastructure; Machine learning screening readiness ; Policy planning support	Public health surveillance ; Awareness raising ; Research prioritization	Clinical care ; Research infrastructure; Public health monitoring; Policy development	Clinical research ; Variant interpretation ; Phenotype-genotype correlation	Biomedical research; Clinical case series ; Functional validation of gene-disease association	Clinical characterization; Research in pathogenesis and epidemiology; Support treatment decisions; International collaboration and data sharing	Primarily research; Some support clinical care and policy; Fragmented use in health system integration	Policy design; registry planning; Healthcare system coordination; Informing the Australian National Strategic Action Plan for Rare Diseases	Biomedical and genomic research; Biomarker discovery; Patient registry integration; Diagnostic improvement	Clinical care; Rare disease research; Semantic integration of national and international registries	Observational registry; Research infrastructure Evaluation of treatment; Basis for future interventions	Cross-disease research infrastructure; Integration of biobanks with registries to support biomedical research and policy development	Yes, revised by ethics committees, especially in CGRRs and TRs	Clinical research, data sharing, interoperability, federated queries across registries	Clinical care, biobanking, research, early diagnosis, biomarker discovery	National surveillance, care coordination, health planning, research	Global genomic data sharing, curation of LSDBs, clinical variant databases, standardization
Improved diagnostic accuracy?	Expected, but not directly measured (Not mentioned quantitatively)	Yes, particularly in pediatric rare disease cohorts	Not directly mentioned	Mentioned as a goal, not quantitatively reported	Not directly mentioned	Not directly reported, but registry supports standardized diagnostic data collection	Not assessed, the study focuses on infrastructure, not patient-level outcomes	Not measured, diagnostic gaps are reported as a problem	Not directly measured, but MDS aims to enable more consistent and structured diagnoses	Partially, database helped in identifying recurring mutations and associated features	Yes, supports pathogenic role of PIGQ in EIEE and expands phenotypic spectrum	Not directly evaluated; Registry aims to improve clinical recognition of USAIDs	Not explicitly reported; potential assumed through better data infrastructure	Expected outcome of coordinated data, but not measured	Yes, through linking annotated biospecimens and phenotypic data	Facilitated by integration of clinical and imaging data across centers	Not explicitly stated, but registry includes detailed clinical confirmation and classification	Suggested through integration of clinical-genomic-biospecimen data, but not directly measured	Clinical diagnosis (implied in CGRRs); Biomedical/genomic research; herapeutic decision support; Health service planning; Public policy; Epidemiological surveillance; Interoperability;	Not directly mentioned	Yes (via biomarkers)	Not explicitly stated	Yes (via variant classification harmonization)
Reduced time to diagnosis?	Not mentioned	Yes, WGS/WES reduced diagnostic odyssey	Not applicable – focus is on data standardization in research, not diagnostic processes	Not mentioned	Not mentioned	Not mentioned	Not mentioned	Not addressed quantitatively; diagnostic delay is highlighted as a concern	Not assessed	Not addressed	Not quantified, but early genetic diagnosis highlighted as essential	Not mentioned	Not mentioned	Identified as a national goal, but not directly measured in this study	Suggested indirectly by improved interoperability and access to annotated samples	Not directly mentioned	Not discussed	Anticipated benefit, but not yet evaluated	Not mentioned	Not directly mentioned	Yes (prospectively)	Not explicitly stated	Not directly mentioned
Personalized treatment?	Yes, supports personalized and precision medicine approaches	Yes, genomics guided clinical management and targeted therapies	Facilitates data needed for personalized/targeted therapy research	Yes, supports data-driven personalization of patient care pathways	Facilitates research that supports personalized/targeted therapies	Supports clinical decision-making and follow-up plans tailored to severity and phenotype	Indirectly supported — better data infrastructure may enable downstream personalization	Discussed in terms of variability and inconsistency in treatment approaches	Indirectly supported, allows tracking of therapeutic strategies across patients	Indirectly supported, allowed better understanding of phenotypic spectrum and recurrence risks	Not applied, no specific therapies yet, though implications discussed for precision diagnostics	Yes, includes documentation of individual therapeutic responses and adverse events	Not systematically addressed; some registries inform therapeutic decisions	Identified as a goal of future data use, but not evaluated	Yes, biospecimens enable targeted therapy and personalized approaches	Yes, data supports treatment strategies based on clinical and hemodynamic profiles	Supported, registry captures hydroxyurea use, treatment outcomes, barriers to care	Supported by linking molecular/genetic profiles to clinical phenotypes	Not mentioned	Not directly mentioned	Yes (based on biomarkers)	Not explicitly stated	Yes (potential through variant impact)
Clinical prognosis change?	Not directly reported, but expected benefit noted	Yes, early diagnosis enabled timely intervention	Not directly addressed	Not directly reported	Not mentioned	Enables longitudinal tracking and stratification, though impact on prognosis is not quantitatively assessed	Not addressed	Not evaluated	Not mentioned	Not systematically evaluated	Not reported, all patients had severe neurodevelopmental outcomes	Not directly measured, but registry allows tracking of long-term outcomes	Not measured	Not measured	Implied via better biomarker discovery and diagnostic tracking, but not directly measured	Not directly assessed, but registry aims to support long-term prognostic studies	Not directly addressed, but data enables future prognosis analysis	Not measured directly	Implied in treatment registries (TRs)	Not directly mentioned	Yes (goal of project)	Not mentioned	Not mentioned
New gene/biomarker discovery?	Yes, one of the main objectives is to broaden phenotype-genotype correlations	Yes, national data enabled new gene discovery research	Supports biomarker qualification studies	Not applicable – AKU is monogenic with known gene (HGD)	Yes, supported over 200 research projects including gene discovery	Facilitates research but does not focus on gene discovery (DM1 is monogenic)	Not applicable — no single registry studied, but enabling environment discussed	Not applicable, not the focus of the article	Not applicable, focus is infrastructure and harmonization	No, focus was on clinical utility of existing mutation data	Yes, PIGQ established as a novel gene associated with EIEE	Not main objective, but data may contribute indirectly to future discoveries	Mentioned as a goal in a few registries, but not evaluated across the review	Not applicable to this policy-focused study	Yes, enabled by linked biospecimens and registry data (e.g., gene discovery, biomarker validation)	Not discussed, but structure allows biospecimen integration	Not a primary focus, but registry data may support such research (e.g., hydroxyurea impact, reproductive outcomes)	Yes, intended use case of linked data and biospecimens	Not mentioned	Not mentioned	Yes (biomarker discovery)	Not mentioned	Yes (variant discovery focus)
Genomic annotation advances?	Yes, registry supports this goal	Yes, improved variant interpretation and curation	Not mentioned	Not mentioned	Not directly addressed	Not applicable	Not mentioned	Not mentioned	Not mentioned	Limited, annotations based on pre-existing mutation reports	Yes, functional studies confirmed variant pathogenicity, enhancing gene annotation	Not mentioned	Not discussed	Not discussed	Yes, integration with omics and phenotype-genotype correlation	Not mentioned	Not mentioned	Yes, facilitated by integrated molecular/clinical datasets	Implied, particularly in CGRRs	Yes (semantic data model)	Yes (multi-omics planned)	Not mentioned	Yes (central objective)
Molecular classification improvement?	Yes, especially for new or rare mAIDs	Yes, stratification in cancer and rare diseases	Not mentioned	Not mentioned	Not explicitly, but supports deeper molecular phenotyping	Yes, supports stratification by CTG repeat size and phenotype	Not mentioned	Not mentioned	Not directly addressed	Not formalized, phenotypic variability was discussed, but no new classification system proposed	Yes, expanded phenotypic-genotypic landscape of GPI-anchor biosynthesis disorders	Possibly, through data aggregation and phenotype-genotype correlation, but not explicitly stated	Not addressed directly	Not addressed	Yes, through harmonized biobank-registry data enabling refined subtypes	Yes, through semantic standardization and phenotype-genotype data modeling	No	Yes, supports disease stratification and discovery	Yes, supported by genetic and mutation data in CGRRs	Yes (via ontologies like ORDO/HPO)	Yes (integration of clinical/genomic/CSF data)	Partially (diagnosis coding)	Yes (through data harmonization)
Policy influence?	Registry supports harmonization across Europe and links to ERDRI and MeRITA	Yes, informed national genomics policies and workforce planning	Yes, supports regulatory alignment (e.g., FDA, EMA)	Indirect , integrated with a national registry and digital health ecosystem in Italy	Not mentioned	Yes, integrated in national RD strategy and referenced by health authorities	Yes, recommendations align with EU rare disease data policies and implementation strategies	Yes, article calls for inclusion of these disorders in public health frameworks	Yes, supports French national rare disease policy and European recommendations	No	No	Not mentioned	Limited; review highlights lack of national coordination and limited impact on national strategies	Yes, core objective of the study is to support development of national rare disease registry policy	Yes, contributed to European-level programs like RD-Connect, IRDiRC, national initiatives (Spain)	Yes, aligned with national initiatives (e.g., BNDMR, RaDiCo)	Indirect, registry aims to support evidence-based care models and implementation science	Yes, designed to support NIH, FDA and international policy efforts in rare diseases	Yes,PHRs influenced health service planning and involved regional authorities	Yes (supports FAIR/ERN CDE guidelines)	Yes (data for future national policies)	Yes (aligns with Swiss National Rare Disease Policy)	Yes (endorsed by WHO, country-level projects)
Impact on public programs?	Yes, indirectly through ERN RITA and patient organization partnerships	Yes, genomic medicine incorporated into national healthcare frameworks	Not mentioned	Yes, supports the national AKU platform (AKUhub), with registry, apps, and knowledge graph	Contributes to European research infrastructures (EuroBioBank, RD-Connect)	Yes, data used to inform national and regional healthcare planning and rare disease centers	Yes, contributes to evaluation of readiness for ML-based screening in public health contexts	Yes, notes lack of inclusion in many surveillance and funding initiatives	Yes, implemented as part of the French Plan for Rare Diseases 2 (PNMR2)	No, database was institutionally managed and not linked to health system use	No	Not applicable – registry is research-focused, not linked to national health programs	Minimal; calls for greater integration with the National Strategic Action Plan for Rare Diseases	Yes, aims to operationalize the National Strategic Action Plan; contributes to sustainable rare disease data infrastructure	Yes, integrated into national rare disease registry in Spain; collaboration with public health authorities	Yes, supports national coordination of rare disease reference centers	Yes, funded by NHLBI and aligned with national health disparities strategy	Yes, contributes to initiatives like the Rare Diseases Clinical Research Network (RDCRN) and international data-sharing	Yes, disease surveillance and planning in public health registries	Yes (ERDRI infrastructure)	Yes (linked to National Biobank & CDC-Korea)	Yes (policy-oriented registry)	Yes (supports national plans for genomic databases)
Data standardization/interoperability?	Yes, integrates OMIM, ICD-10, INFEVERS, EPIRARE CDE, FAIR principles	Yes, implementation of national genomics data infrastructure and standard terminologies	Yes, central focus of the study, using CDISC to enable interoperability across studies, registries, and regulatory submissions	Yes, emphasizes interoperability, modularity, FAIR data principles, integration of semantic layers	Yes, integrated with European rare disease biobanking networks and standards	Yes, interoperable with Orphanet, integrated with national RD platforms and EU CERFA standards	Yes, central to the study; barriers and facilitators to harmonization of RD databases mapped across Europe	No, a central issue is the absence of standardized data collection and reporting systems	Yes, key objective of the study, to harmonize RD data collection across centers using standardized vocabularies	Limited, the database was purpose-built, not integrated with wider networks or ontologies	No, single study, not linked to databases or MDS networks	Partial – uses REDCap, allows multicenter input; lacks explicit use of international vocabularies like HPO or Orphanet	Poor; majority of registries lack harmonization; strong recommendation for adoption of FAIR principles and international standards	Strongly emphasized; calls for standardized terminology, data models, interoperability frameworks, and FAIR principles	Strong, use of HPO, GUID, CDEs, standard operating procedures, RD-Connect integration	Strong, developed using ontologies and semantic interoperability tools (MetaSurv, alignment with HPO, ICD-10, Orphanet, etc.)	High, multi-site REDCap, standardized tools (ASCQ-Me, PROMIS, PhenX), publicly shared forms and data dictionary	High, built on CDEs, controlled vocabularies, privacy-compliant architecture, and modular interoperability model	Yes, central goal of the EPIRARE project	Yes (semantic model + CDEs + RDF ontology)	Partially (via iCreaT platform + national integration)	Yes (ORPHA coding + cross-center data sharing)	Yes (core mission: harmonized variant data)
Sequencing modality (Panel / WES / WGS / Other)	NR	WES + WGS	NR	Other (digital platform integrating omics + clinical data)	NR	NR	NR	NR	NR	NR	WES	NR	NR	NR	NR	NR	NR	NR	NR	NR	NR	NR	NR
Reference genome (GRCh37 / GRCh38 / NR)	NR	GRCh37 + GRCh38 (mixed, transitioning to GRCh38)	NR	NR	NR	NR	NR	NR	NR	NR	GRCh37	NR	NR	NR	NR	NR	NR	NR	NR	NR	NR	NR	NR
Trio/singleton design (Trio / Singleton / Other / NR)	NR	Trio (majority), some Singleton	NR	NR	NR	NR	NR	NR	NR	NR	Trio	NR	NR	NR	NR	NR	NR	NR	NR	NR	NR	NR	NR
Sample type (blood / saliva / tissue / NR)	NR	Blood (main), some saliva/tissue	NR	NR	Blood, muscle, fibroblasts, urine, CSF	Blood, tissue (linked biobanking mentioned)	NR	NR	NR	NR	Blood	NR	NR	NR	NR	NR	NR	NR	NR	NR	Blood, DNA, RNA, fibroblasts, tissues	NR	NR
Variant calling pipeline (BWA/GATK, DeepVariant, NR)	NR	BWA + GATK (standard national pipeline)	NR	Likely GATK-based variant calling (standard pipelines cited)	NR	NR	NR	NR	NR	NR	BWA + GATK	NR	NR	NR	NR	NR	NR	NR	NR	NR	NR	NR	NR
Annotation tools/databases (VEP, ANNOVAR, ClinVar, gnomAD, OMIM, etc.)	OMIM, HGNC, ICD-10, INFEVERS	VEP, ClinVar, OMIM, gnomAD	OMIM, ClinVar, CDISC SDTM/ADaM standards	ClinVar, OMIM, gnomAD, Orphanet, HPO	NR	OMIM, Orphanet, ICD-10	OMIM, Orphanet, ICD-10, HPO (referenced for harmonization)	NR	OMIM, Orphanet, ICD-10, HPO (usados para estruturação do MDS)	OMIM, HGMD, locus-specific databases	VEP, ClinVar, OMIM, gnomAD	OMIM, ICD-10, Orphanet, INFEVERS	OMIM, Orphanet, ICD-10, HPO (citados como referenciais de padronização)	OMIM, Orphanet, ICD-10, HPO (citados como referenciais para padronização)	NR	HPO, ICD-10, Orphanet, MedDRA, ATC, gene names	NR	OMIM, Orphanet, ICD-10, GUIDs	OMIM, Orphanet, ICD-10, HPO (citados como referenciais)	OMIM, Orphanet, ICD-10, HPO (citados na FAIRification)	OMIM, ICD-10, HPO	OMIM, Orphanet, ICD-10, HPO	OMIM, HGVS, Locus-specific DBs, ClinVar precursors
CNV/SV calling supported? (Yes/No/NR)	NR	Yes	NR	Yes, supports CNV/SV integration	NR	NR	NR	NR	NR	NR	No	NR	NR	NR	NR	NR	Yes, REDCap + PhenX + PROMIS	NR	NR	NR	NR	NR	NR
Reanalysis policy (Yes/No/Frequency)	Yes, flexible modular registry allows updates	Yes, periodic (every 12–18 months)	Yes, encourages updates via CDISC governance	Yes, reanalysis integrated in platform workflow	Yes, supports data/sample updates	Yes, longitudinal registry with regular updates	Yes, recommends periodic updates for FAIR compliance	No	Yes, recommends continuous updating of the MDS	Yes, stresses need for continuous updates	NR	Yes, modular registry with continuous updating	Yes, recommends continuous updates and harmonization	Yes, recommends continuous registry updating and harmonization	Indirectly yes, promotes reanalysis via linked registries/biobanks	Yes, continuous updating and semantic harmonization	NR	Yes, continuous updating via RDCRN governance	Yes, recommends continuous updating and harmonization	Yes, FAIRification process enables continuous reanalysis	Yes, registry allows continuous updating	Yes, international registry updated continuously	Yes, recommends continuous reanalysis and updates
Use of HPO? (Yes/No/NR)	Indirectly (not explicit HPO coding)	Yes, HPO systematic	No	Yes, HPO ontology central	No	Yes (phenotyping standardized, HPO-compatible)	Yes, HPO discussed as essential	No	Yes, HPO integrated	No	Yes	Indirectly, HPO-compatible but not explicit	Yes, HPO cited as essential	Yes, HPO recommended	Yes, HPO explicitly recommended	Yes, HPO integrated	NR	Yes, HPO-compatible structure	Yes, HPO highlighted	Yes, HPO integrated	Yes, HPO integrated	Yes, HPO integrated	Yes, HPO recommended
Phenotype-driven prioritization (Exomiser, AMELIE, etc.)	NR	Yes, Exomiser used	No	Yes, phenotype–genotype prioritization module	No	Yes, phenotype-driven modules	Yes, phenotype–genotype integration via ML frameworks	No	Yes, phenotype-driven classification supported	Indirectly, phenotype-genotype correlations possible	Yes, phenotype-driven prioritization with Exomiser	NR	Yes, phenotype–genotype integration discussed	Yes, phenotype–genotype integration via standard ontologies	Likely Exomiser/PhenoTips (mentioned as phenotype tools)	Yes, phenotype-driven prioritization via semantic alignment	NR	Likely, phenotype-driven prioritization possible	Yes, phenotype–genotype integration through registry typology	Yes, phenotype–genotype prioritization possible via FAIR Linked Data	Likely phenotype-driven prioritization possible	Likely phenotype-driven prioritization possible	Yes, phenotype-driven variant interpretation supported
Avg HPO terms/case (if given)	NR	~6–8 terms/case	NR	NR	NR	NR	NR	NR	NR	NR	NR	NR	NR	NR	NR	NR	NR	NR	NR	NR	NR	NR	NR
Variants reported (P/LP, VUS, LB/B)	Yes, P/LP, VUS, LB/B via INFEVERS	P/LP, VUS, LB/B	NR	P/LP, VUS	NR	P/LP, VUS (captured in registry)	NR	NR	NR	NR	P/LP variants	Variants (P/LP, VUS) recorded in registry	NR	NR	DNA, sera, plasma, tissue used for biomarker discovery	NR	NR	NR	NR	NR	NR	NR	NR
Genes newly implicated (list or NR)	NR	Yes, several new DD/ID and rare disease genes reported	NR	NR (platform supports new gene discovery but not reported here)	NR	NR	NR	NR	NR	NR	Yes, PIGQ newly implicated	NR	NR	NR	Likely multiple, but not specified	NR	NR	NR	NR	NR	NR	NR	NR
Mode of inheritance captured? (AD/AR/XL/de novo/NR)	Yes, AD/AR/de novo captured	AD, AR, XL, de novo	NR	AD/AR/de novo fields supported	NR	Yes, AD/AR inheritance recorded	NR	NR	NR	NR	AR	Yes, AD/AR/de novo fields included	NR	NR	NR	NR	NR	NR	NR	NR	NR	NR	NR
Functional validation performed? (Yes/No/NR)	NR	Yes, functional assays for candidate variants	NR	NR	NR	NR	NR	NR	NR	NR	Yes, functional validation with zebrafish + in vitro assays	NR	NR	NR	Yes, biomarker discovery validated via biobank samples	NR	NR	NR	NR	NR	NR	NR	NR
Therapeutic impact (Yes/No/NR + detail)	Indirectly, monitors response to therapies (biologics, colchicine)	Yes, ~50% diagnostic yield impacted clinical care (treatment change, surveillance)	Indirectly, harmonization supports regulatory submissions	Yes, supports decision-making and personalized therapy selection	Indirectly, provides material for therapy development and biomarker studies	Yes, supports clinical management and therapy monitoring	Indirectly, data harmonization supports precision medicine	Yes, highlights major unmet therapeutic needs	Indirectly, MDS facilitates therapeutic decision-making	Indirectly, curated DBs inform management options	Yes, guides seizure management options	Indirectly, registry supports therapy monitoring and personalized care	Indirectly, standardized registries support therapy optimization	Indirectly, national registry framework supports therapy pathways	Yes, linked biobanks inform therapy development	Indirectly, registry facilitates management and therapy guidance	Indirectly, improves SCD care quality	Indirectly, registry supports therapy development	Indirectly, registries improve therapy pathways	Indirectly, FAIR registry improves therapy and care	Indirectly, registry supports therapy development	Indirectly, registry facilitates therapy development	Indirectly, curated DBs inform therapeutic choices
Clinical trial eligibility (Yes/No/NR)	Yes, registry linked to ClinicalTrials.gov (NCT05200715)	Yes, facilitated trial recruitment	Yes, facilitates trial readiness	Yes, platform supports trial matching	Yes, biobank supports trial readiness and recruitment	Yes, registry linked to clinical trial readiness	Yes, harmonized data structures facilitate trial readiness	Yes, emphasizes need for trial infrastructure	Yes, MDS structure supports clinical trial readiness	Yes, databases support trial design and eligibility	Yes, family eligible for gene-specific trial consideration	Yes, registry linked to trial readiness	Yes, registry harmonization supports trial readiness	Yes, strategy emphasizes trial readiness	Yes, registries/biobanks used for trial recruitment	Yes, registry supports clinical trial readiness	Yes, registry supports trial readiness	Yes, registries + biobanks support trial recruitment	Yes, registry typology facilitates trial readiness	Yes, FAIR registry facilitates trial readiness	Yes, registry facilitates clinical trial recruitment	Yes, registry enables multinational trial recruitment	Yes, standardized variant DBs support trial readiness
Genetic counselling enabled (Yes/No/NR)	Yes, supports genotype–phenotype classification	Yes, genetic counselling integral to program	Yes, data standardization supports counselling and communication	Yes, counselling supported via integrated reports	Yes, biobank data supports counselling in research context	Yes, genetic counselling integrated	Yes, standardized data improve counselling and care coordination	Yes, genetic counselling mentioned as critical gap	Yes, counselling enabled by structured data sharing	Yes, databases assist counselling in NF and similar disorders	Yes, counselling provided	Yes, registry supports counselling integration	Yes, registries facilitate counselling and patient support	Yes, counselling facilitation included in framework	Yes, genetic counselling supported via registry integration	Yes, counselling supported via standardized patient data	Yes, counselling supported via structured data	Yes, counselling supported via integrated registry-biobank	Yes, counselling facilitated via structured data	Yes, FAIR data supports counselling	Yes, registry supports genetic counselling	Yes, counselling facilitated via shared registry data	Yes, genetic counselling supported via curated DBs
